# Supplementary material for: Calculation of Mechanical Properties, Electronic Structure and Optical Properties of CsPbX3 (X = F, Cl, Br, I)
Source: MDPI journal article supplement (doi:10.3390/molecules28227643), 2023-11-17

## Supplementary Information

Figure S1. The cell structure of CsPbX<sub>3</sub>

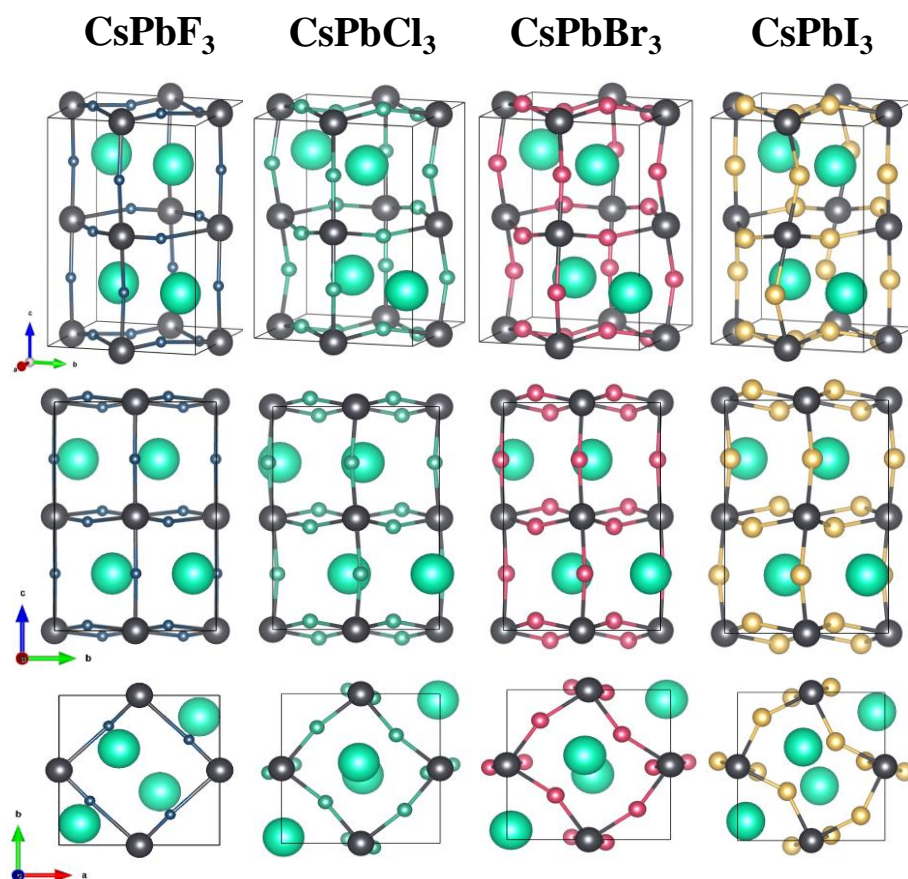

Figure S2. Details of the four structures optimized (CIF)

| CsPbF <sub>3</sub> |              |              |               | CsPbCl <sub>3</sub> |              |              |               |
|--------------------|--------------|--------------|---------------|---------------------|--------------|--------------|---------------|
| 1.0                |              |              |               | 1.0                 |              |              |               |
|                    | 8.2069997787 | 0.0000000000 | 0.0000000000  |                     | 8.2069997787 | 0.0000000000 | 0.0000000000  |
|                    | 0.0000000000 | 8.2550001144 | 0.0000000000  |                     | 0.0000000000 | 8.2550001144 | 0.0000000000  |
|                    | 0.0000000000 | 0.0000000000 | 11.7589998245 |                     | 0.0000000000 | 0.0000000000 | 11.7589998245 |
| F                  | Cs           | Pb           |               | Cl                  | Cs           | Pb           |               |
| 12                 | 4            | 4            |               | 12                  | 4            | 4            |               |
| Direct             |              |              |               | Direct              |              |              |               |
|                    | 0.691559970  | 0.203950003  | 0.023830000   |                     | 0.776690006  | 0.223830000  | 0.038400002   |
|                    | 0.308440030  | 0.796050012  | 0.976170003   |                     | 0.223309994  | 0.776170015  | 0.961600006   |
|                    | 0.191559970  | 0.296050012  | 0.976170003   |                     | 0.276690006  | 0.276170015  | 0.961600006   |
|                    | 0.808440030  | 0.703949988  | 0.023830000   |                     | 0.723309994  | 0.723829985  | 0.038400002   |
|                    | 0.308440030  | 0.796050012  | 0.523829997   |                     | 0.223309994  | 0.776170015  | 0.538399994   |
|                    | 0.691559970  | 0.203950003  | 0.476170003   |                     | 0.776690006  | 0.223830000  | 0.461600006   |
|                    | 0.808440030  | 0.703949988  | 0.476170003   |                     | 0.723309994  | 0.723829985  | 0.461600006   |
|                    | 0.191559970  | 0.296050012  | 0.523829997   |                     | 0.276690006  | 0.276170015  | 0.538399994   |
|                    | 0.963020027  | 0.503239989  | 0.250000000   |                     | 0.080380000  | 0.527079999  | 0.250000000   |
|                    | 0.036979999  | 0.496760011  | 0.750000000   |                     | 0.919619977  | 0.472920001  | 0.750000000   |
|                    | 0.463019997  | 0.996760011  | 0.750000000   |                     | 0.580380023  | 0.972920001  | 0.750000000   |
|                    | 0.536979973  | 0.003239989  | 0.250000000   |                     | 0.419620007  | 0.027079999  | 0.250000000   |
|                    | 0.872690022  | 0.856729984  | 0.250000000   |                     | 0.987259984  | 0.958670020  | 0.250000000   |
|                    | 0.127309978  | 0.143270016  | 0.750000000   |                     | 0.012740016  | 0.041329980  | 0.750000000   |
|                    | 0.372690022  | 0.643270016  | 0.750000000   |                     | 0.487259984  | 0.541329980  | 0.750000000   |
|                    | 0.627309978  | 0.356729984  | 0.250000000   |                     | 0.512740016  | 0.458670020  | 0.250000000   |
|                    | 0.500000000  | 0.000000000  | 0.000000000   |                     | 0.500000000  | 0.000000000  | 0.000000000   |
|                    | 0.000000000  | 0.500000000  | 0.000000000   |                     | 0.000000000  | 0.500000000  | 0.000000000   |
|                    | 0.500000000  | 0.000000000  | 0.000000000   |                     | 0.500000000  | 0.000000000  | 0.500000000   |
|                    | 0.000000000  | 0.500000000  | 0.500000000   |                     | 0.000000000  | 0.500000000  | 0.500000000   |



**Figure S4. CASTEP Geometry Optimization and Optimization Convergence**

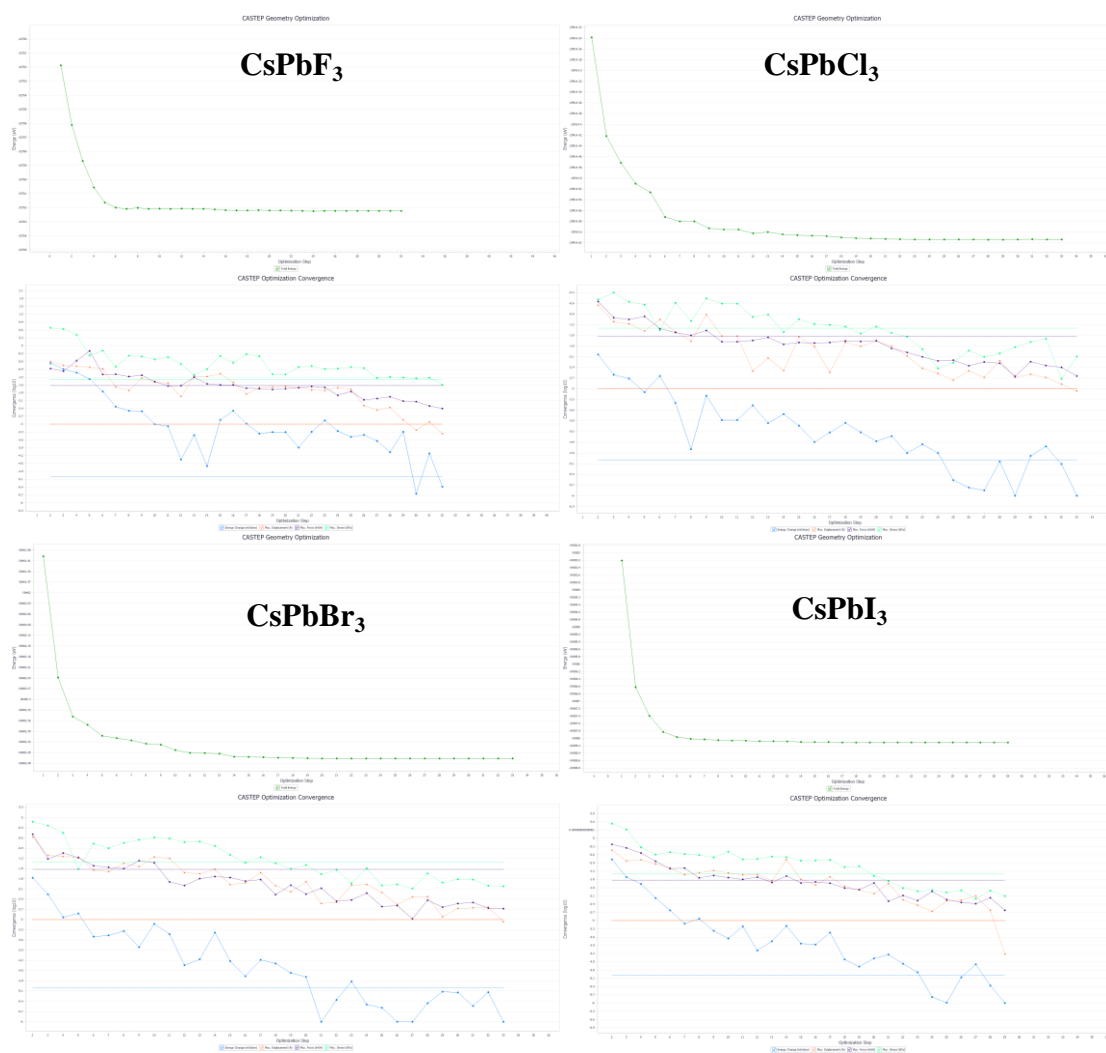

Supplement: s1 [file s1]
